# Supplementary material for: Key Factors in Enhancing Pseudocapacitive Properties of PANI-InOx Hybrid Thin Films Prepared by Sequential Infiltration Synthesis
Source: MDPI journal article supplement (doi:10.3390/polym15122616), 2023-06-08
Supplement: s1 [file s1]

## **Supporting Information**

### **Key Factors in Enhancing Pseudocapacitive Properties of PANI-InO<sub>x</sub> Hybrid Thin Films Prepared by Sequential Infiltration Synthesis**

Jiwoong Ham <sup>1</sup>, Hyeong-U Kim <sup>2</sup> and Nari Jeon <sup>1,\*</sup>

<sup>1</sup> Department of Materials Science and Engineering, Chungnam National University, Daejeon 34134, Republic of Korea; maxbasic55@o.cnu.ac.kr

<sup>2</sup> Department of Plasma Engineering, Korea Institute of Machinery & Materials (KIMM), Daejeon 34103, Republic of Korea; guddn418@kimm.re.kr

\* Corresponding author: njeon@cnu.ac.kr

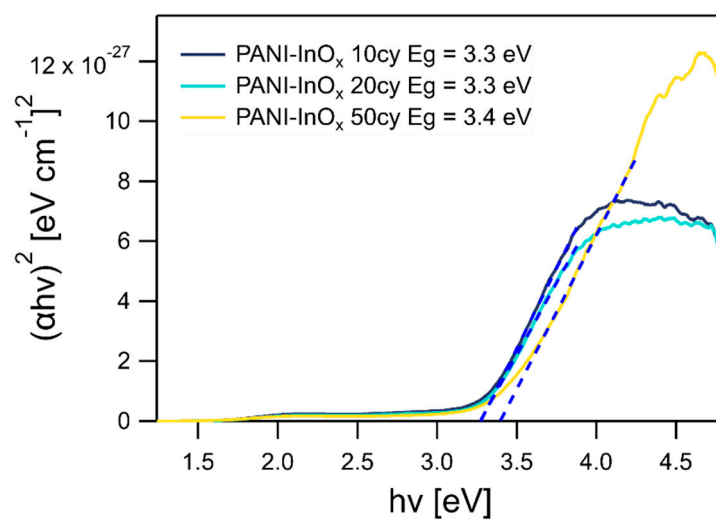

**Figure S1.** Tauc plots of PANI-InO<sub>x</sub> sample prepared with 10, 20, and 50 SIS cycles.

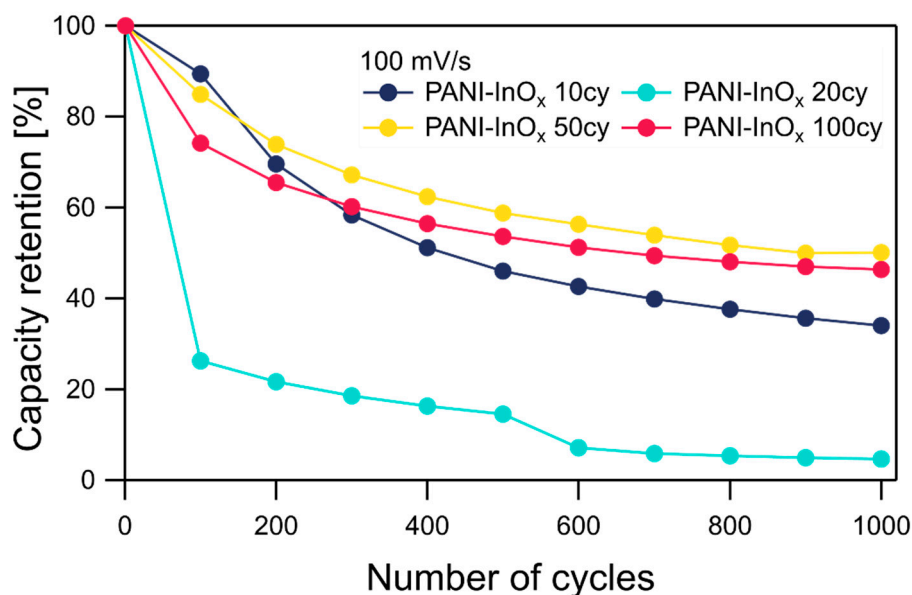

**Figure S2.** Capacity retention test of PANI-InO<sub>x</sub> samples prepared with 10, 20, 50, and 100 SIS cycles. The CVs were collected at a scan rate of 100 mV/sec in an aqueous electrolyte of neutral pH.

Capacitance retention tests (**Figure S2**) were performed for 1,000 cycles at a scan rate of 100 mV/s within the potential window, as shown in **Figure 4**. The samples were exposed to the electrolyte for approximately 6 h. Most samples, except for the 20 cy sample displayed a gradual decrease in capacitance values. This decreasing trend can be attributed to the dissolution of composite films in the electrolyte<sup>[1]</sup>. The 50 cy sample, which had the highest capacitance value among the test samples, exhibited the highest capacitance retention.

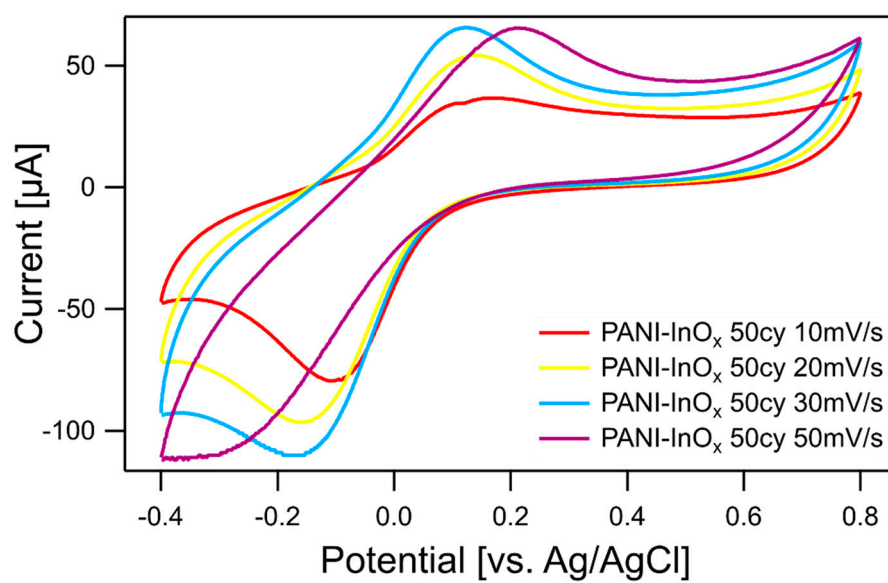

**Figure S3.** CV curves of 50 cy PANI-InO<sub>x</sub> sample collected at different scan rates as noted in the Figure.

## Reference

- (1) Yue, J.; Lin, L.; Jiang, L.; Zhang, Q.; Tong, Y.; Suo, L.; Hu, Y.-s.; Li, H.; Huang, X.; Chen, L. Interface Concentrated-Confinement Suppressing Cathode Dissolution in Water-in-Salt Electrolyte. *Adv. Energy Mater.* **2020**, *10* (36), 2000665. <https://doi.org/10.1002/aenm.202000665>
